# Supplementary material for: Hydrous salts of 1-aminoethylidenediphosphonic acid and piperazidine: temperature induced reversible structural transformation in a humid environment
Source: Royal Society of Chemistry journal article supplement (doi:10.1039/c5ra22428d), 2016-01-01
Supplement: c5ra22428d1.pdf [file c5ra22428d1.pdf]

## Supporting information

### Hydrous salts of 1-aminoethylidenediphosphonic acid and piperazine: temperature induced reversible structural transformation in humid environment

The authors: Di Tian<sup>a</sup>, Lang Li,<sup>a</sup> Liang-jie Yuan<sup>a,\*</sup>, Shuo-ping Chen<sup>b,\*</sup>

<sup>a</sup>College of Chemistry and Molecular Sciences, Wuhan University, Wuhan 430072, P. R. China,

\*Corresponding author. E-mail: ljyuan@whu.edu.cn. Tel: +86-27-8721-8264. Fax: +86-27-8721-8264.

<sup>b</sup> College of Materials Science and Engineering, Guilin University of technology, Guilin 541004,

P. R. China. \*Corresponding author. E-mail: chenshuoping\_777@163.com. Tel: +86-773-5896290.

**Figure S-1.** The ORTEP of compound 1 with thermal ellipsoids at the 30% probability level.

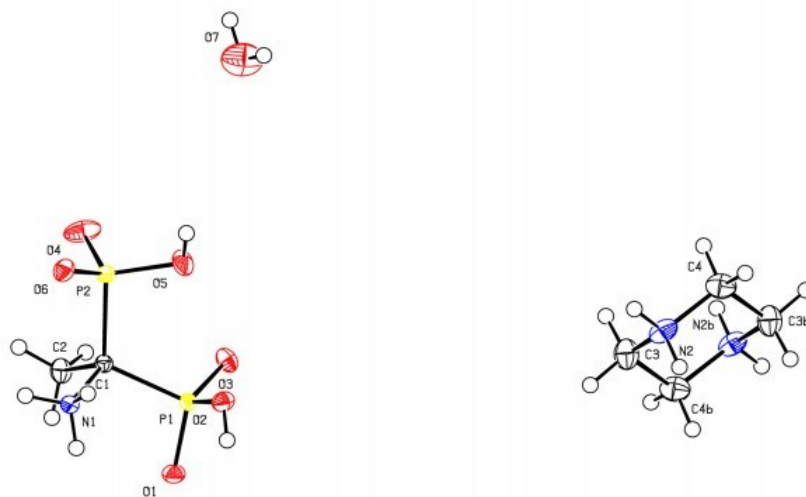

**Figure S-2.** The ORTEP of compound 2 with thermal ellipsoids at the 30% probability level.

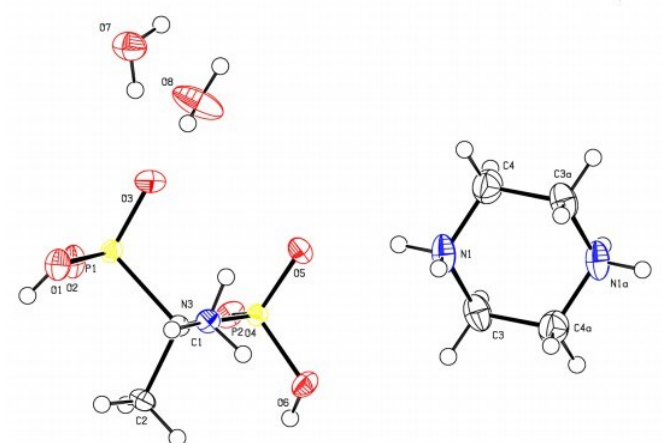

**Figure S-3.** The ORTEP of compound 3 with thermal ellipsoids at the 30% probability level.

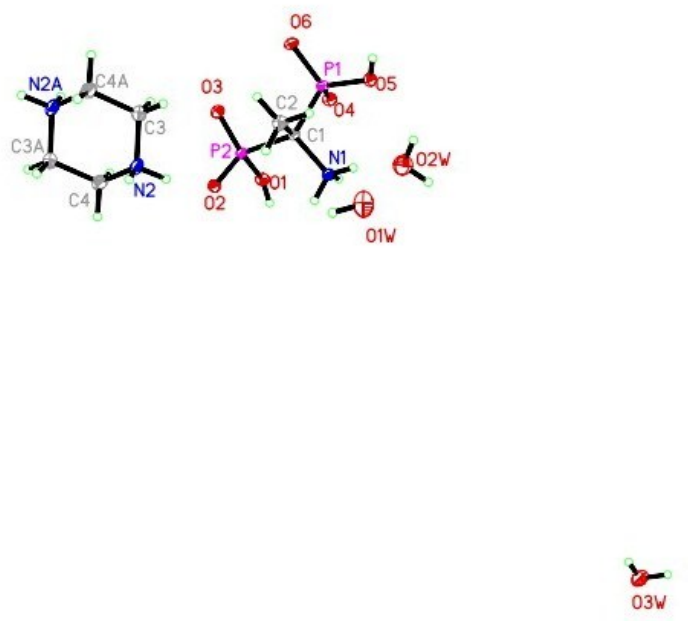

**Figure S-4.** IR spectra of compounds 1-3.

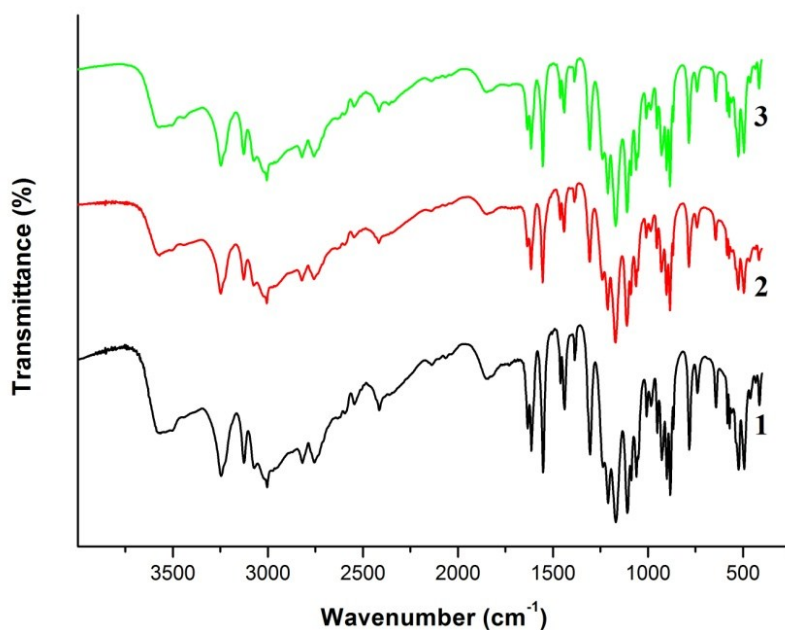

**Figure S-5.** TG curves of compounds 1-3 in air (black line: compound 1; blue line: compound 2; red line: compound 3). Compound 1 can be stable up to 150 °C in air, then, it decomposes until 185 °C, one lattice water is lost on the first stage with the weight decreasing 3.96% (theoretical value is 3.50%). The weight loss occurring between 292 °C and 800 °C corresponds to the decomposition of the dehydration products. The final product in 800 °C is probably assumed to be  $P_2O_3$ , and the observed total weight loss (42.21%) is similar to the calculated value (42.78%). The thermogravimetric curves of compound 2 and 3 are similar. The first step start at 50 °C and end at 185 °C, corresponding to the release of lattice water molecules. The observed weight loss (12.53%) of compound 2 is approximate to the calculated value (12.67%), the observed weight loss (18.50%) of compound 3 is also approximate to the calculated value (17.87%). The second step cover the temperature from 292 °C and 800 °C. The final product of compound 2 are probably assumed to be  $P_2O_3$ , and the observed total weight loss (38.56%) is similar to the calculated value (38.71%). The final products of compound 3 are probably assumed to be the mixture of  $P_2O_3$  and  $P_2O_5$ , the observed total weight loss (44.25%) contains 25.87%  $P_2O_3$  and 74.13%  $P_2O_5$ .

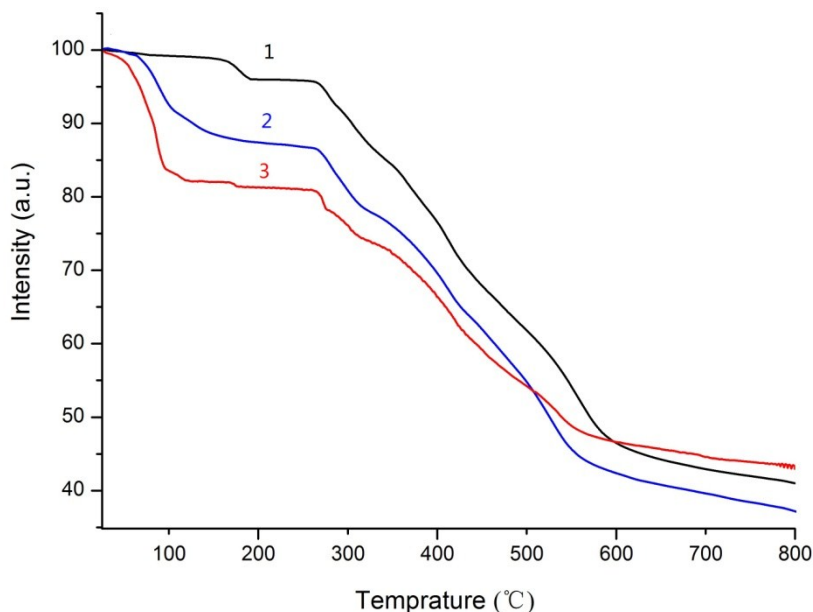

**Table S-1.** Hydrogen bonds of compounds 1 [ $\text{\AA}$  and  $^\circ$ ].

| Donor-H $\cdots$ Acceptor | D(Donor...Acceptor) | $\angle$ (Donor-H $\cdots$ Acceptor) |
|---------------------------|---------------------|--------------------------------------|
| O(5)-H(5)...O(1)#2        | 2.5234(15)          | 151.2                                |
| O(2)-H(2)...O(6)#3        | 2.5359(14)          | 169.5                                |
| N(2)-H(2B)...O(3)#4       | 2.7266(16)          | 157.3                                |
| N(2)-H(2A)...O(4)#5       | 2.6963(17)          | 161.6                                |
| N(1)-H(1C)...O(1)         | 3.0146(15)          | 114.5                                |
| N(1)-H(1C)...O(2)#3       | 3.0281(15)          | 157.2                                |
| N(1)-H(1B)...O(1)#6       | 2.7956(15)          | 166.0                                |
| N(1)-H(1A)...O(6)#7       | 2.7543(15)          | 172.8                                |

Symmetry transformations used to generate equivalent atoms: #1  $-x,-y+1,-z$ ; #2  $x,y+1,z$ ; #3  $-x+1/2,y-1/2,-z+3/2$ ; #4  $x,-y+1,z-1/2$ ; #5  $x,y,z-1$ ; #6  $-x+1/2,y+1/2,-z+3/2$ ; #7  $-x+1/2,-y+1/2,-z+2$ .

**Table S-2.** Hydrogen bonds of compounds 2 [ $\text{\AA}$  and  $^\circ$ ].

| Donor-H $\cdots$ Acceptor | D(Donor...Acceptor) | $\angle$ (Donor-H $\cdots$ Acceptor) |
|---------------------------|---------------------|--------------------------------------|
| O(6)-H(6)...O(4)#2        | 2.5614(18)          | 172.3                                |
| O(1)-H(7)...O(2)#3        | 2.5794(19)          | 175.3                                |
| N(3)-H(1A)...O(2)#4       | 2.8075(19)          | 149.1                                |
| N(3)-H(1B)...O(8)#4       | 2.738(2)            | 141.7                                |
| N(3)-H(1C)...O(4)#4       | 2.8021(18)          | 149.7                                |
| N(1)-H(2D)...O(5)         | 2.750(2)            | 164.3                                |
| N(1)-H(2E)...O(7)#5       | 2.680(2)            | 165.3                                |
| O(7)-H(3)...O(5)#6        | 2.739(2)            | 155(3)                               |
| O(7)-H(4)...O(3)          | 2.671(2)            | 176(3)                               |
| O(8)-H(5)...O(3)          | 2.830(2)            | 173(3)                               |

|                    |          |        |
|--------------------|----------|--------|
| O(8)-H(2)...O(5)#6 | 2.927(2) | 138(3) |
| O(8)-H(2)...O(3)#6 | 3.268(2) | 137(3) |

Symmetry transformations used to generate equivalent atoms: #1 -x+2,-y+2,-z+1; #2 -x+1,-y+1,-z;  
#3 -x+1,-y,-z; #4 x+1,y,z; #5 -x+2,-y+1,-z+1; #6 -x+1,-y+1,-z+1.

**Table S-3.** Hydrogen bonds of compounds 3 [ $\text{\AA}$  and  $^\circ$ ].

| Donor-H...Acceptor     | D(Donor...Acceptor) | <(Donor-H...Acceptor) |
|------------------------|---------------------|-----------------------|
| O(1)-H(1)...O(4)#2     | 2.5388(18)          | 173(4)                |
| O(5)-H(5)...O(6)#3     | 2.5141(19)          | 172(4)                |
| O(1W)-H(1W1)...O(5)#4  | 2.879(2)            | 152(4)                |
| O(1W)-H(2W1)...O(2W)   | 2.821(3)            | 153(4)                |
| O(2W)-H(1W2)...O(3W)#5 | 2.757(3)            | 171(5)                |
| O(2W)-H(2W2)...O(1W)#6 | 2.797(3)            | 167(5)                |
| O(3W)-H(1W3)...O(3)#7  | 3.007(2)            | 156(2)                |
| O(3W)-H(1W3)...O(6)#7  | 2.982(2)            | 123(2)                |
| O(3W)-H(2W3)...O(3)#8  | 2.854(2)            | 174(3)                |
| N(1)-H(1A)...O(2W)     | 2.786(2)            | 167.2                 |
| N(1)-H(1B)...O(2)#9    | 2.7891(18)          | 160.4                 |
| N(1)-H(1C)...O(1)#2    | 2.951(2)            | 157.6                 |
| N(1)-H(1C)...O(4)#2    | 3.078(2)            | 118.2                 |
| N(2)-H(2D)...O(2)      | 2.781(2)            | 149.5                 |
| N(2)-H(2D)...O(4)#4    | 2.953(2)            | 119.6                 |
| N(2)-H(2E)...O(3)#4    | 2.926(2)            | 145.8                 |
| N(2)-H(2E)...O(6)#4    | 3.037(2)            | 129.3                 |

Symmetry transformations used to generate equivalent atoms: #1 -x+1/2,-y+3/2,-z; #2 -x+1/2,y+1/2,-z+1/2; #3 -x+1,y,-z+1/2; #4 x,y+1,z; #5 x+1/2,-y+1/2,z-1/2; #6 -x+1,-y+1,-z+1; #7 x+1/2,-y+1/2,-z+1; #8 x,y,z+1; #9 -x+1/2,y-1/2,-z+1/2.
